for discogenic low back pain and sciatica: A double-blind, placebo-controlled, dose-response pilot study. *ANESTHESIOLOGY* 2007; 107:99-105

26. Kotilainen E, Muittari P, Kirvela O: Intradiscal glycerol or bupivacaine in the treatment of low back pain. *Acta Neurochir (Wien)* 1997; 139:541-5

27. Cousins MJ, Mather LE: Intrathecal and epidural administration of opioids. *ANESTHESIOLOGY* 1984; 61:276-310

28. Finckh A, Zufferey P, Schurch MA, Balague F, Waldburger M, So AK: Short-term efficacy of intravenous pulse glucocorticoids in acute discogenic sciatica. A randomized controlled trial. *Spine* 2006; 31:377-81

29. Abdi S, Datta S, Trescot A, Schultz D, Adlaka R, Atluri S, Smith HS, Manchikanti L: Epidural steroids in the management of chronic spinal pain: A systematic review. *Pain Physician* 2007; 10:185-212

30. Stav A, Ovadia L, Sternberg A, Kaadan M, Weksler N: Cervical epidural steroid injection for cervicobrachialgia. *Acta Anaesth Scand* 1993; 37:562-6

31. Wilson-MacDonald J, Burt G, Griffin D, Glynn C: Epidural steroid injection for nerve root compression. *J Bone Joint Surg (Br)* 2005; 87:352-5

32. Weinstein JN, Tosteson TD, Lurie JD, Tosteson AN, Blood EA, Hanscom B, Herkowitz H, Cammisa F, Albert T, Boden SD, Hilibrand A, Goldberg H, Berven

S, An H: SPORT Investigators: Surgical *versus* nonsurgical treatment for lumbar degenerative spondylolisthesis. *N Engl J Med* 2007; 356:2257-70

33. Owlia MB, Salimzadeh A, Alishiri G, Haghghi A: Comparison of two doses of corticosteroid in epidural steroid injection for lumbar radicular pain. *Singapore Med J* 2007; 48:241-5

34. Eich E, Reeves JL, Jaeger B, Graff-Radford SB: Memory for pain: Relation between past and present pain intensity. *Pain* 2005; 23:375-80

35. Yaksh TL, Rathbun M, Jage J, Mirzai T, Grafe M, Hiles RA: Pharmacology and toxicology of chronically infused epidural clonidine HCl in dogs. *Fundam App Toxicol* 1994; 23:319-35

36. Yaksh TL, Provencher JC, Rathbun ML, Myers RR, Powell H, Richter P, Kohn FR: Safety assessment of encapsulated morphine delivered epidurally in a sustained-release multivesicular liposome preparation in dogs. *Drug Deliv* 2000; 7:27-36

37. Cohen SP, Strassels S, Kurihara C, Crooks MT, Bleckner LL, Forsythe A, Marcuson M: Outcome predictors for sacroiliac (lateral branch) radiofrequency denervation. *Reg Anesth Pain Med* 2009; (in press).

## ANESTHESIOLOGY REFLECTIONS

### Anesthetizing Enemy Sailors

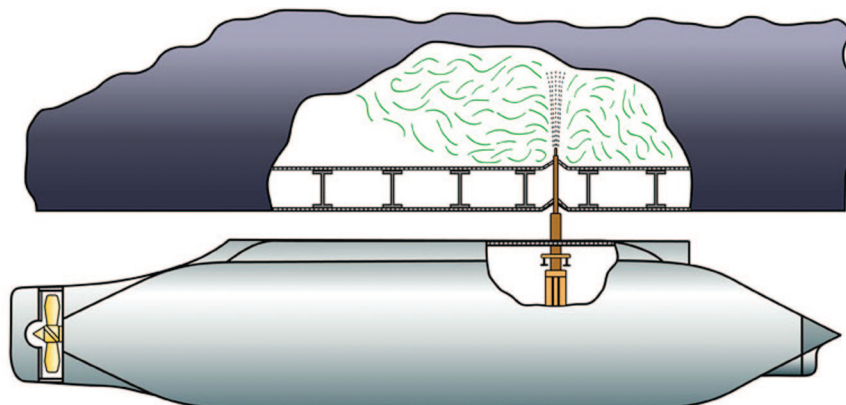

In May of 1907, a Newton, Massachusetts resident named Carl M. Wheaton finished designing his "Means for Conducting Submarine Warfare." Wheaton's innovation connected "a submarine . . . to . . . a floating ship by driving a pin . . . through the bottom of the ship, and in subsequently injecting an anesthetic gas . . . to overcome and anesthetize the crew of the ship attacked. Preferably . . . the anesthetic [would be] injected into the engine or boiler room [rendering] . . . the ship helpless . . . [and possibly] enabling the ship to be captured practically without loss of life." Unfortunately, Wheaton himself suffered loss of life during the astonishing eight years that the U.S. Patent Office spent in evaluating his filing. Less than seven weeks after the U.S. Patent No. 1,131,761 was granted to Wheaton's administratrix, the transatlantic ocean liner *Lusitania* was sunk on May 7, 1915 by a single torpedo launched by submariners onboard Germany's *U-20*. (Copyright © the American Society of Anesthesiologists, Inc. This image appears in the *Anesthesiology Reflections* online collection available at [www.anesthesiology.org](http://www.anesthesiology.org).)

George S. Bause, M.D., M.P.H., Honorary Curator, ASA's Wood Library-Museum of Anesthesiology, Park Ridge, Illinois, and Clinical Associate Professor, Case Western Reserve University, Cleveland, Ohio. [UJYC@aol.com](mailto:UJYC@aol.com).
